# Supplementary material for: Sulfite Oxidase Activity Is Essential for Normal Sulfur, Nitrogen and Carbon Metabolism in Tomato Leaves
Source: MDPI journal article supplement (doi:10.3390/plants4030573), 2015-08-14
Supplement: s1 [file s1]

## Supplementary Materials

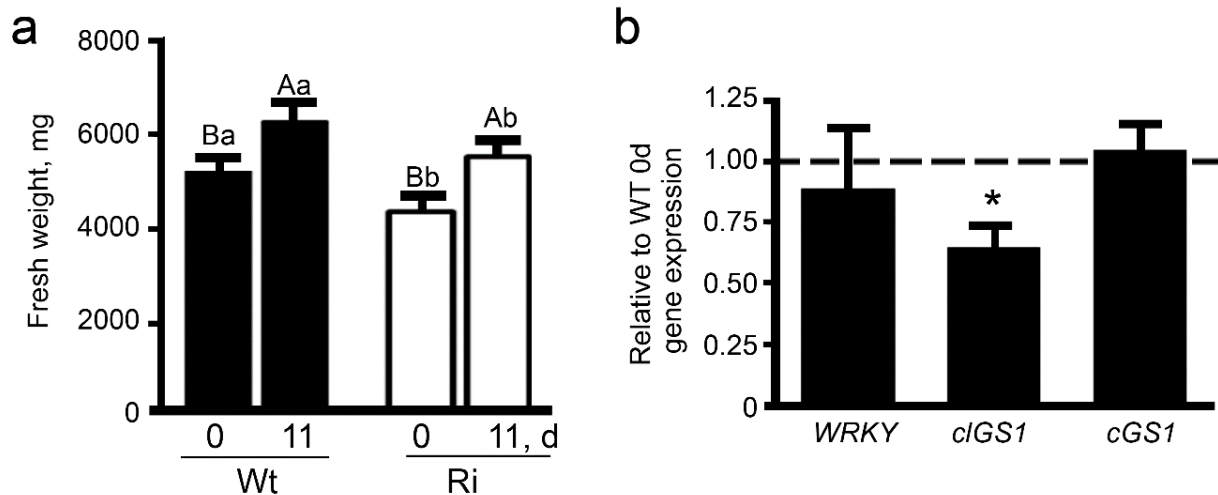

**Supplementary Figure S1.** (a) Total biomass accumulation (roots and upper plant part) in wild-type (Wt) and SO RNA interference mutants (Ri) plants grown under normal growth conditions (0 day) and after being exposed to eleven days extended dark stress (11 day). The bars are the average values  $\pm$  SE ( $n = 10$  individual experiments). The values denoted with different letters are significantly different according to the Turkey-Kramer HSD test (JMP 8.0 software, <http://www.jmp.com/>;  $p < 0.05$ ). Different lower case letters indicate differences between SO mutant and wild-type plants within the same treatment. Different upper case letters indicate significant difference within the plant genotypes in response to treatment; (b) Relative to wild type (T0) expression of senescence marker genes *WRKY* transcription factor 2d-1 (*WRKY*), *chloroplast glutamine synthetase1* (*cIGS1*) and *cytosolic glutamine synthetase* (*cGS1*) in SO mutants. The bars are the average values  $\pm$  SE ( $n = 3$  individual experiments). Significance of the results (\*) was calculated by Student's *t*-test (JMP 8.0 software, <http://www.jmp.com/>;  $p < 0.05$ ). The data for SO-compromised plants represent the mean for SO Ri 131 and SO Ri 421 mutants.

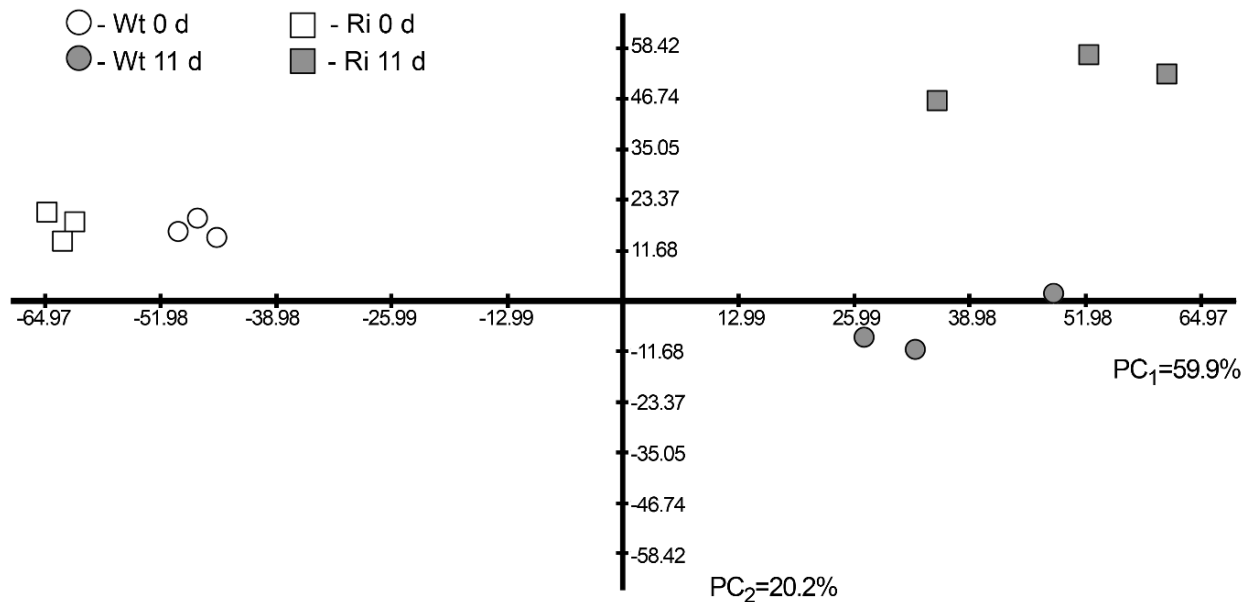

**Supplementary Figure S2.** Principal component analysis of C, N and S metabolites detected in wild-type and SO RNA interference (Ri) tomato mutants during normal growth conditions (0 d) and dark stress (11 day, see legend on the plot). First principal component (PC<sub>1</sub>) and second principal component (PC<sub>2</sub>) are plotted on the axes. The variance explained by each component is indicated on the plot. The three representative replicates of each sample were selected from 3 to 8 independent replicates (see Experimental Section) according to a simple random sampling model (<http://www.gobookee.net/practice-of-statistics-daniel-yates>) in freely distributed R-project (version 2.15.1), integrated by median normalization of the entire sample set for each parameter. The PCA plot was built in software package tMEV (<http://www.tm4.org/>). The data for the *SO*-compromised plants represent the mean for *SO Ri* 131 and *SO Ri* 421 mutants, 3–4 independent biological replication per mutant, where each replication is a bulk of 5 independent plants. The data for the WT plants represent mean obtained from 4–8 independent biological replications, where each replication is a bulk of 5 independent plants. The metabolites data integrated by median normalization are compiled in Supplementary Table S1.

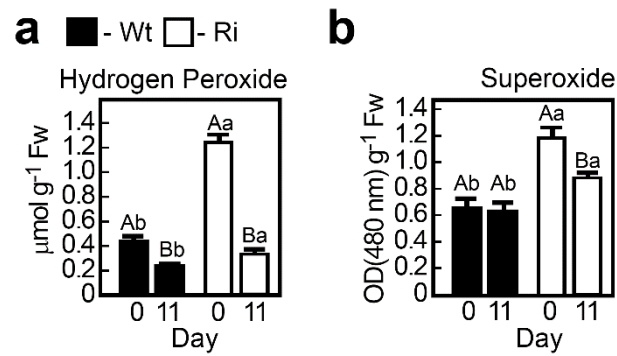

**Supplementary Figure S3.** Reactive oxygen species (ROS) in wild-type (WT) and SO RNA interference mutants (Ri) plants grown under normal growth conditions (0 day) and after being exposed to eleven days extended dark stress (11 day). Top leaves of WT and Ri tomato plants were used to detect hydrogen peroxide (**a**) and superoxide (**b**) in extract treated with 2 mM tungstic acid and 1 mM DPI to stop ROS generating activity in the extract. The bars are the average values  $\pm$  SE ( $n = 3\text{--}6$  individual experiments). The values denoted with different letters are significantly different according to the Turkey-Kramer HSD test (JMP 8.0 software, <http://www.jmp.com/>;  $p < 0.05$ ). Different lower case letters indicate differences between SO mutant and wild-type plants within the same treatment. Different upper case letters indicate significant difference within the plant genotypes in response to treatment. The data for SO-compromised plants represent the mean for SO Ri 131 and SO Ri 421 mutants.

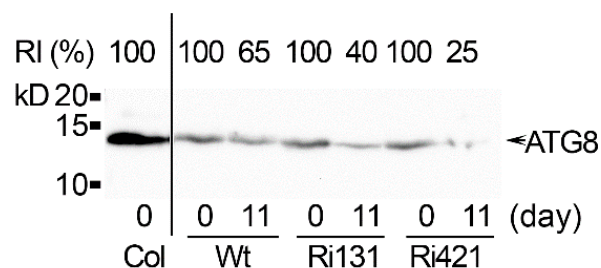

**Supplementary Figure S4.** The level of ATG8 protein in wild-type (Wt) and SO RNA interference mutants (Ri) plants grown under normal growth conditions (0 day) and after being exposed to eleven days extended dark stress (11 day). ATG8 protein was detected with ATG8 specific antibody. Arabidopsis Col-0 were used as positive controls.

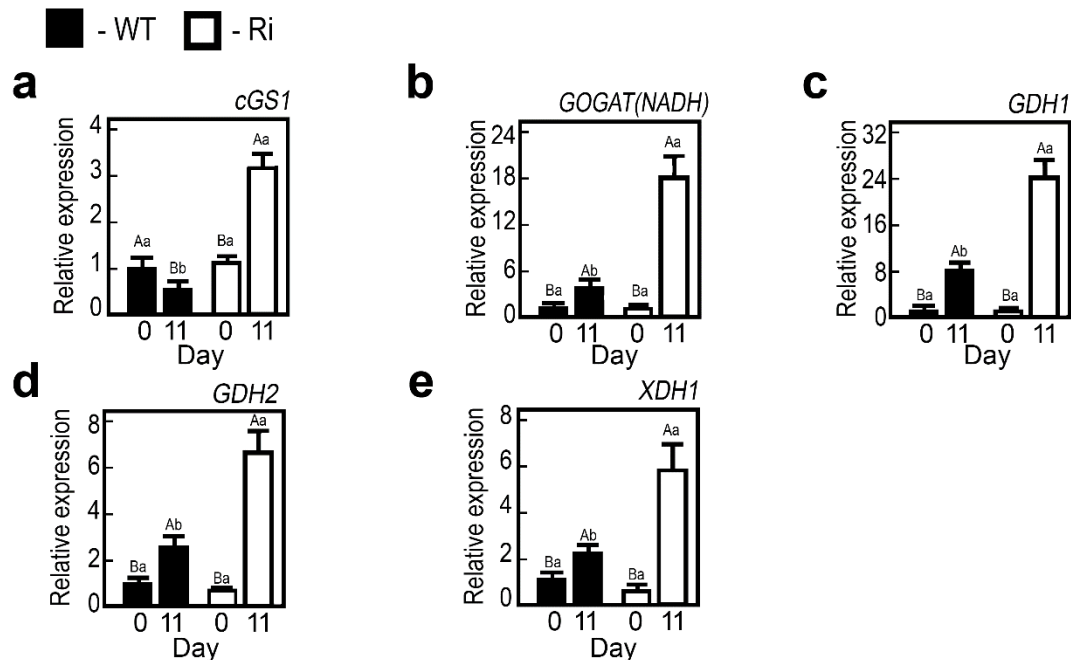

**Supplementary Figure S5.** The expression levels of selected nitrogen assimilation and purine catabolism genes in wild-type (WT) and SO RNA interference mutants (Ri) plants grown under normal growth conditions (0 day) and after being exposed to eleven days extended dark stress (11 day). Top leaves of WT and Ri tomato plants were used to determine the quantitative transcript expression analysis of the (a) Cytosolic glutamine synthase 1 (cGS1); (b) Glutamate synthase GOGAT (NADH); (c) Glutamate dehydrogenase1 (*GDH1*); (d) Glutamate dehydrogenase2 (*GDH2*) and (e) xanthine dehydrogenase1 (*XDH1*). The relative expression after normalization to *TFIID* (*SGN-U329249*) is calculated by comparison with corresponding gene expression in WT plants at day 0 (set as 1.0). The values denoted with different letters are significantly different according to the Turkey-Kramer HSD test [JMP 8.0 software, <http://www.jmp.com/>;  $p < 0.05$ , ( $n = 6$ )]. Different lower case letters indicate differences between SO mutant and wild-type plants in the same treatment. Different upper case letters indicate significant difference within the plant genotypes in response to treatment. The data for SO-compromised plants represent the mean for SO Ri 131 and SO Ri 421 mutants.

**Supplementary Table S2.** Turnover of sulfur containing metabolites in wild-type (Wt) and SO RNA interference mutants (Ri) plants grown under normal growth conditions (0, day) and after being exposed to extended dark stress for eleven days (11, day) <sup>N.B.</sup>.

| S-containing metabolites,<br>( $\mu\text{mol g}^{-1} \text{ Fw}$ ) |                                    | Wt         |            | Ri         |            | Degraded S-metabolites |           |
|--------------------------------------------------------------------|------------------------------------|------------|------------|------------|------------|------------------------|-----------|
|                                                                    |                                    | 0 day      | 11 day     | 0 day      | 11 day     | Wt                     | Ri        |
| S Inorganic                                                        | Oxidized S                         | 6.1980 Bb  | 10.0859 Aa | 8.6343 Aa  | 8.8121 Ab  | −3.8879 b              | −0.1779 a |
|                                                                    | Reduced S ( $\text{H}_2\text{S}$ ) | 0.0153 Ab  | 0.0133 Aa  | 0.0198 Aa  | 0.0132 Ba  | 0.0020 b               | 0.0066 a  |
| S Organic                                                          | Total cysteine                     | 0.3366 Ab  | 0.1403 Ba  | 0.5971 Aa  | 0.1397 Ba  | 0.1963 b               | 0.4574 a  |
|                                                                    | Total methionine                   | 0.6326 Ab  | 0.4984 Ba  | 0.8858 Aa  | 0.4496 Ba  | 0.1343 b               | 0.4362 a  |
|                                                                    | Total glutathione                  | 0.3381 Aa  | 0.2120 Bb  | 0.3457 Aa  | 0.3125 Aa  | 0.1260 a               | 0.0332 b  |
|                                                                    | SQDG                               | 0.4184 Aa  | 0.3071 Ba  | 0.3955 Aa  | 0.3184 Aa  | 0.1112 a               | 0.0771 a  |
|                                                                    | acetyl-Co-A                        | 0.0029 Ab  | 0.0007 Ba  | 0.0057 Aa  | 0.0012 Ba  | 0.0022 b               | 0.0045 a  |
|                                                                    | Co-A                               | 0.0114 Ab  | 0.0036 Bb  | 0.0168 Aa  | 0.0073 Ba  | 0.0078 a               | 0.0095 a  |
|                                                                    | Other S-compounds                  | 11.3289 Ba | 16.4191 Aa | 8.8302 Bb  | 17.8548 Aa | −5.0903 a              | −9.0246 b |
| Total S                                                            |                                    | 19.2821 Ba | 27.6804 Aa | 19.7309 Ba | 27.9088 Aa | −8.3983 a              | −8.1779 a |
| Total organic S                                                    |                                    | 13.0688 Ba | 17.5812 Aa | 11.0768 Bb | 19.0835 Aa | −4.5124 b              | −8.0667 a |

N.B. The sulfur containing metabolites were detected in the top leaves as an addition to the published in [14]. The contribution of other S-compounds was calculated as the difference between known S-containing metabolites to the total content of sulfur. The organic S was calculated as the difference between total S to the inorganic S (oxidized + reduced). The degraded S-metabolites were calculated as the difference between metabolite content in the unstressed plants (0d) to the content detected in plants after the dark stress (11 day). The values denoted with different letters are significantly different according to the Turkey-Kramer HSD test (JMP 8.0 software, [37];  $p < 0.05$ .  $n = 3-10$ ). Different lower case letters indicate differences between SO mutant and wild-type plants at the same treatment. Different upper case letters indicate significant difference within the plant genotypes in response to treatment. The data for SO-compromised plants represent the mean for SO Ri 131 and SO Ri 421 mutants.

**Supplementary Table S3.** Free and protein bound amino acids in wild-type (Wt) and SO RNA interference mutants (Ri) plants grown under normal growth conditions (0 day) and after being exposed to eleven days extended dark stress (11 day).

| Amino Acids<br>(nmol g <sup>-1</sup> Fw) | -----Bound Amino Acids----- |                            |                 |                  | -----Free Amino Acids----- |                            |                 |                            | Degraded AA |           |
|------------------------------------------|-----------------------------|----------------------------|-----------------|------------------|----------------------------|----------------------------|-----------------|----------------------------|-------------|-----------|
|                                          | <u>WT 0</u><br><u>day</u>   | <u>WT 11</u><br><u>day</u> | <u>Ri 0 day</u> | <u>Ri 11 day</u> | <u>WT 0</u><br><u>day</u>  | <u>WT 11</u><br><u>day</u> | <u>Ri 0 day</u> | <u>Ri 11</u><br><u>day</u> | <u>WT</u>   | <u>Ri</u> |
| Asp                                      | 4573 Aa                     | 2093 Ba                    | 5045 Aa         | 2429 Ba          | 219 Bb                     | 945 Ab                     | 353 Ba          | 1510 Aa                    | 1754 a      | 1459 a    |
| Lys                                      | 3063 Ab                     | 1382 Ba                    | 3422 Aa         | 1611 Ba          | 3 Bb                       | 720 Aa                     | 14 Ba           | 293 Ab                     | 964 b       | 1532 a    |
| Met                                      | 624 Ab                      | 290 Ba                     | 866 Aa          | 243 Ba           | 15 Ba                      | 222 Aa                     | 13 Ba           | 198 Aa                     | 127 b       | 438 a     |
| Thr                                      | 2836 Ab                     | 1347 Ba                    | 3226 Aa         | 1573 Ba          | 178 Bb                     | 463 Aa                     | 268 Aa          | 295 Ab                     | 1204b       | 1626 a    |
| Glu                                      | 4964 Ab                     | 2254 Ba                    | 5537 Aa         | 2628 Ba          | 371 Bb                     | 1450 Aa                    | 516 Ba          | 1225 Aa                    | 1631 b      | 2200 a    |
| Pro                                      | 2681 Ab                     | 1288 Ba                    | 3040 Aa         | 1486 Ba          | 39 Bb                      | 31 Ab                      | 66 Aa           | 73 Aa                      | 1401 a      | 1547 a    |
| Cys                                      | 314 Ab                      | 114 Ba                     | 579 Aa          | 104 Ba           | 16 Ba                      | 21 Aa                      | 20 Ba           | 35 Aa                      | 195 b       | 460 a     |
| Gly                                      | 4512 Ab                     | 2209 Ba                    | 5016 Aa         | 2573 Ba          | 210 Ab                     | 257 Aa                     | 566 Aa          | 270 Ba                     | 2256 a      | 2739 a    |
| Ser                                      | 2525 Ab                     | 1212 Ba                    | 2844 Aa         | 1411 Ba          | 542 Ba                     | 945Aa                      | 623 Ba          | 994 Aa                     | 910 a       | 1062 a    |
| Ala                                      | 4467 Ab                     | 2211 Ba                    | 5087 Aa         | 2530 Ba          | 801 Bb                     | 334 Ab                     | 1315 Aa         | 943 Aa                     | 2723 a      | 2929 a    |
| Leu                                      | 4537 Ab                     | 2182 Ba                    | 5075 Aa         | 2519 Ba          | 52 Ba                      | 265 Aa                     | 66 Ba           | 289 Aa                     | 2142 a      | 2333 a    |
| Val                                      | 3630 Ab                     | 1685 Ba                    | 4063 Aa         | 1988 Ba          | 87 Ba                      | 407 Aa                     | 116 Ba          | 377 Aa                     | 1625 a      | 1814 a    |
| Phe                                      | 2322 Ab                     | 1158 Ba                    | 2597 Aa         | 1317 Ba          | 38 Ba                      | 1819 Aa                    | 34 Ba           | 2225 Aa                    | -617 a      | -911 a    |
| Tyr                                      | 1653 Ab                     | 787 Ba                     | 1846 Aa         | 905 Ba           | 19 Bb                      | 1851 Aa                    | 31 Ba           | 1076 Ab                    | -966 b      | -104 a    |
| His                                      | 1166 Ab                     | 555 Ba                     | 1349 Aa         | 655 Ba           | 20 Ba                      | 227 Aa                     | 13 Aa           | 49 Ab                      | 404 b       | 658 a     |
| Total AA                                 | 43825 Ab                    | 20774 Ba                   | 49700 Aa        | 23972 Ba         | 2692 Bb                    | 9957 Aa                    | 4014 Ba         | 9852 Aa                    | 15835 b     | 19782 a   |

Asp—aspartate; Lys—lysine; Met—methionine; Thr—threonine; Glu—glutamate; Pro—proline; Cys—cysteine; Gly—glycine; Ser—serine; Ala—alanine; Leu—leucine; Val—valine; Phe—phenylalanine; Tyr—tyrosine; His—histidine. Degraded Amino acid/s were calculated as the difference between bound at 0 day and 11 day minus the difference between free amino acid/s at 0 day and 11 day. The values denoted with different letters are significantly different according to the Turkey-Kramer HSD test (JMP 8.0 software, <http://www.jmp.com/>;  $p < 0.05$ ,  $n = 3$ ). Different lower case letters indicate differences between SO mutant and wild-type plants at the same treatment. Different upper case letters indicate significant difference within the plant genotypes in response to treatment. The data for SO-compromised plants represent the mean for SO Ri 131 and SO Ri 421 mutants.

**Supplementary Table S4.** List of primers used for quantitative real-time PCR (Tomato, *Lycopersicon esculentum* Mill).

| Transcript, Accession Number                                            | Primer's Sequence                                                  |
|-------------------------------------------------------------------------|--------------------------------------------------------------------|
| ACTIN Tom41; U60480                                                     | Fw-CATGCCATTCTCCGTCTTGA<br>Rw-CGCTCGGTCAGGATCTTCAT                 |
| EF 1- $\alpha$ (Elongation factor 1-alpha); SGN-U196120                 | Fw-CCTACTTGAGGCTCTTGACCAGATT<br>Rw-AAAAGTGACAACCATAACCAGGCTTAAT    |
| GOGAT(NADH) Glutamate synthase, NADH/NADPH; SGN-U575483                 | Fw-TTCTGAGAGAACCGGGAGAAGAGTT<br>Rw-CAATTTTGTTCGGTCTTCATGTTGG       |
| XDH1 (Solanum lycopersicum xanthine dehydrogenase 1-like, LOC101252457) | Fw-TCATCTACCCAGGCTCCGCAGAAG<br>Rw-ACAGCAGCAGCAAGCATAGCAGAC         |
| GDH1 (Solanum lycopersicum Glutamate dehydrogenase 2, SGN-U578318)      | Fw-GTGGTAACTGGAAAACCTGTTGATCTC<br>Rw-GAACCAACATTACCAAATCCCTGTATAA  |
| GDH2 (Solanum lycopersicum Glutamate dehydrogenase 2, SGN-U574592)      | Fw-TCCTTTCAGAGAAATTAAGGTGGAATG<br>Rw-CATTTACCTCATCTGGGTCAACCTC     |
| TFIID; SGN-U329249                                                      | Fw-ATAGTCCCTACGCTCCAGAATATTGTCTC<br>Rw-CTCCAGTACAAACCATTTCCCAAGAAG |
| cGS1 Cytosolic glutamine synthetase; SGN-U577193                        | Fw-CAGGACTCTCCCTGGTCCAGTTAC<br>Rw-AGTATAGGCATCACACATGACCAAGAT      |
| clGS1 Chloroplast glutamine synthetase; SGN-U578728                     | Fw-CCGGACCTCAGGGTCCTTACTACT<br>Rw-GGACCTACTTGAAATTCCCACTGTCh       |
| WRKY WRKY transcription factor 2d-1; SGN-U563810                        | Fw-GATGGCTTTTGAGTTAACAGGACAGA<br>Rw-CAAATTTACATACACACCCCTCAACTG    |

**Supplementary Table S5.** The effect of genotype and dark stress on the ratios between the total (protein bound and free amino acids) S-amino acids (Cys and Met) and the non-S total detected amino acids profile in wild-type (WT) and SO RNA interference mutants (Ri) plants.

|                                                                | WT     |        | Ri     |        |
|----------------------------------------------------------------|--------|--------|--------|--------|
| Time in Dark, day                                              | 0      | 11     | 0      | 11     |
| * Non S total detected AA (NSAA), ( $\mu\text{mol g}^{-1}$ Fw) | 45.88  | 30.22  | 52.84  | 33.38  |
| * Total S AA (SAA) ( $\mu\text{mol g}^{-1}$ Fw)                | 0.97   | 0.64   | 1.49   | 0.58   |
| SAA/NSAA ( $\times 100$ , %)                                   | 2.1 Ab | 2.1 Aa | 2.8 Aa | 1.7 Bb |

The values denoted with different letters are significantly different according to the Turkey-Kramer HSD test (JMP 8.0 software, <http://www.jmp.com/>;  $p < 0.05$ ). Different lower case letters indicate significant differences between wild-type and SO mutant plants. Different upper case letters indicate significant differences within the plant genotypes in response to treatment. The data for SO-compromised plants represent the mean for SO Ri 131 and SO Ri 421 mutants. SAA/NSAA ( $\times 100$ , %) indicates the ratio in percentage of the total detected sulfur containing amino acids to the total detected non sulfur amino acids. \* Data from Supplementary Table S3 and Supplementary Figure S1 in Reference [14].
